# Supplementary material for: Analysis of the quinoa genome reveals conservation and divergence of the flowering pathways
Source: PubMed Central journal article supplement (PMC7018680; doi:10.1007/s10142-019-00711-1), 2019-09-12

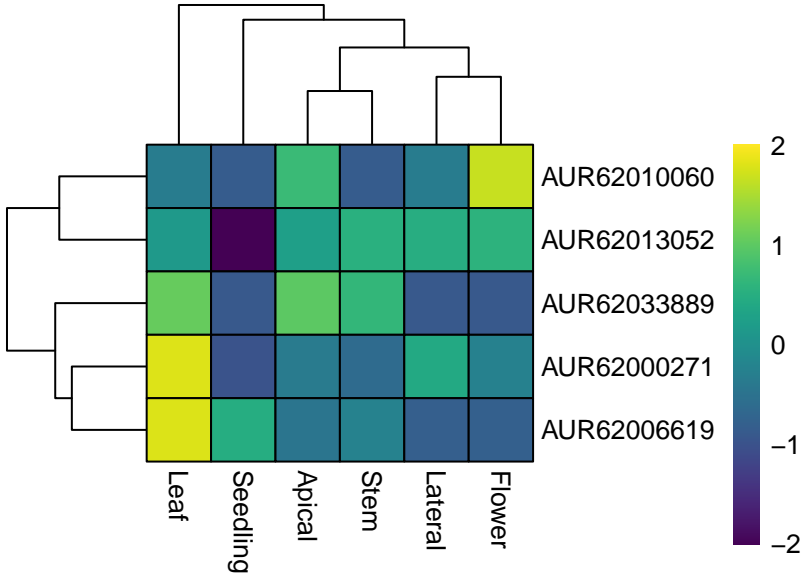

Supplement: 10142_2019_711_MOESM2_ESM.pdf [file 10142_2019_711_MOESM2_ESM.pdf]
